# Supplementary material for: Does Positive Selection Drive Transcription Factor Binding Site Turnover? A Test with Drosophila Cis-Regulatory Modules
Source: PLOS journal article supplement (doi:10.1371/journal.pgen.1002053), 2011-04-28
Supplement: S1 (10.1371/journal.pgen.1002053.s001) [file journal.pgen.1002053.s001.pdf › journal.pgen.1002053.s001.pdf]

**hb no flanking**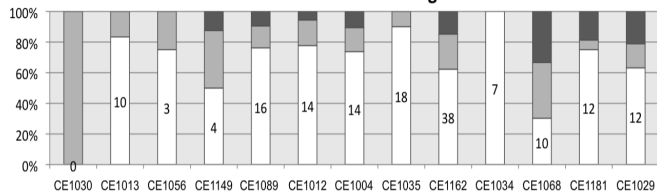**A****hb with flanking 200bp**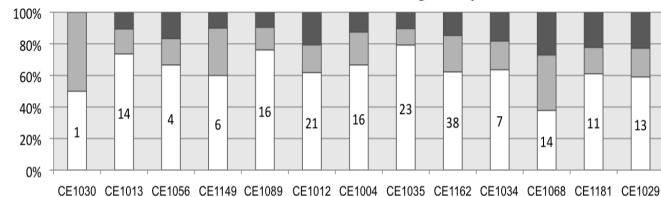**B****BCD no flanking**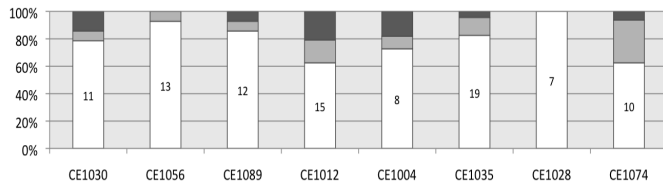**C****BCD with flanking 200bp**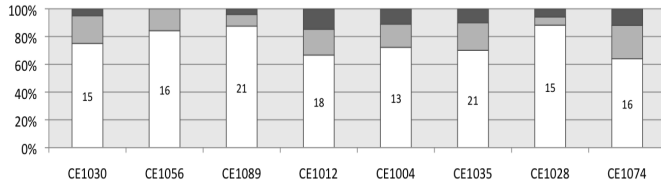**D****KR no flanking**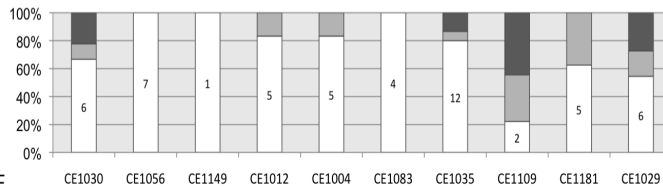**E****KR with flanking 200bp**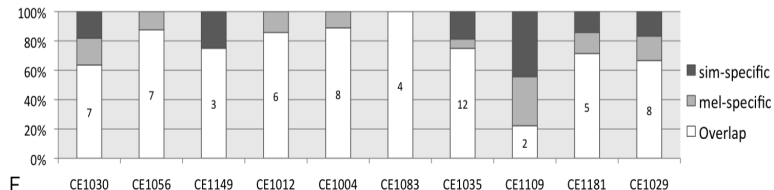**F**

sim-specific  
mel-specific  
Overlap
