# Supplementary material for: Does Positive Selection Drive Transcription Factor Binding Site Turnover? A Test with Drosophila Cis-Regulatory Modules
Source: PLOS journal article supplement (doi:10.1371/journal.pgen.1002053), 2011-04-28

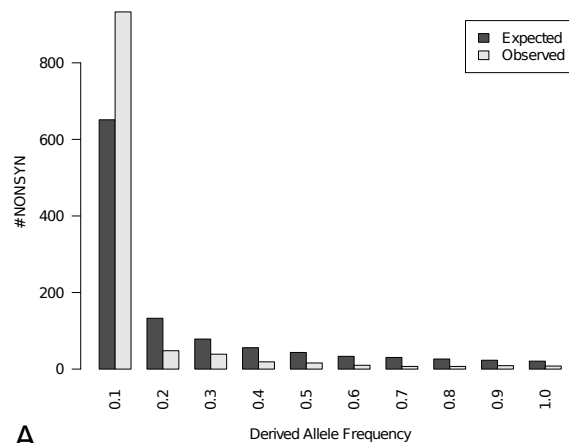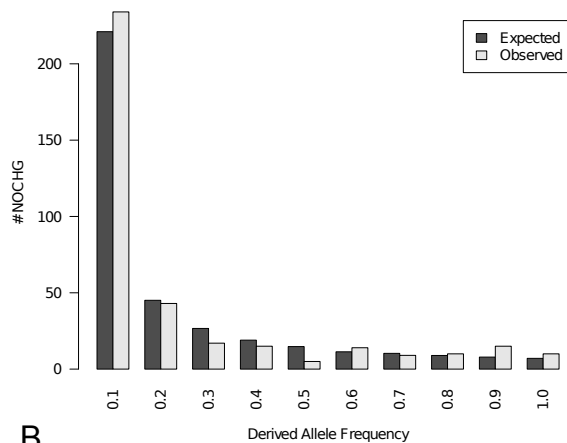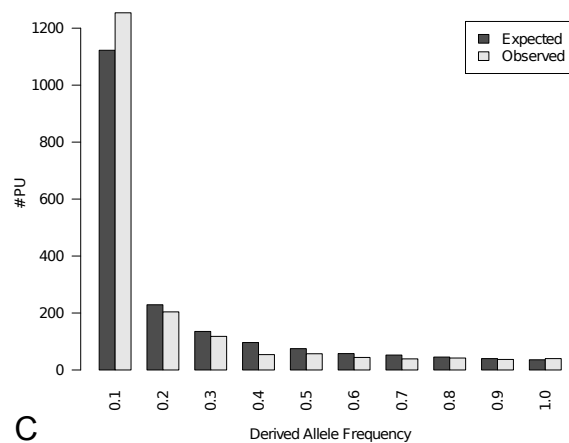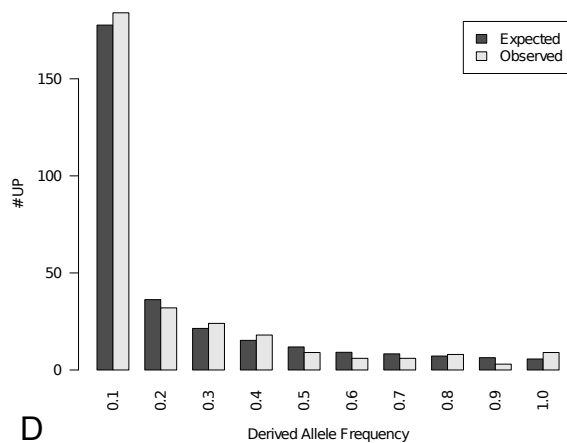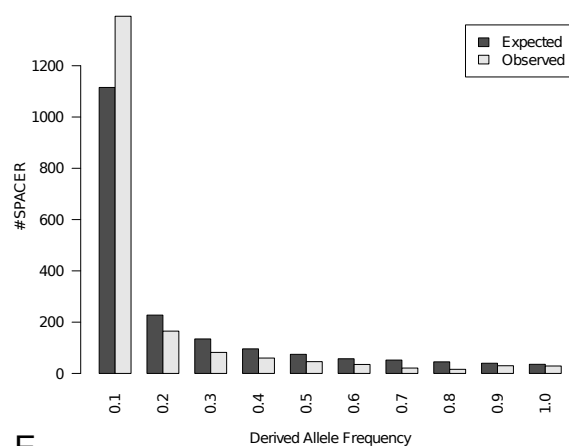

Supplement: S5 (10.1371/journal.pgen.1002053.s005) [file journal.pgen.1002053.s005.pdf › journal.pgen.1002053.s005.pdf]
