# Supplementary material for: Does Positive Selection Drive Transcription Factor Binding Site Turnover? A Test with Drosophila Cis-Regulatory Modules
Source: PLOS journal article supplement (doi:10.1371/journal.pgen.1002053), 2011-04-28
Supplement: S7 (10.1371/journal.pgen.1002053.s007) [file journal.pgen.1002053.s007.pdf › journal.pgen.1002053.s007.pdf]

PWMMel

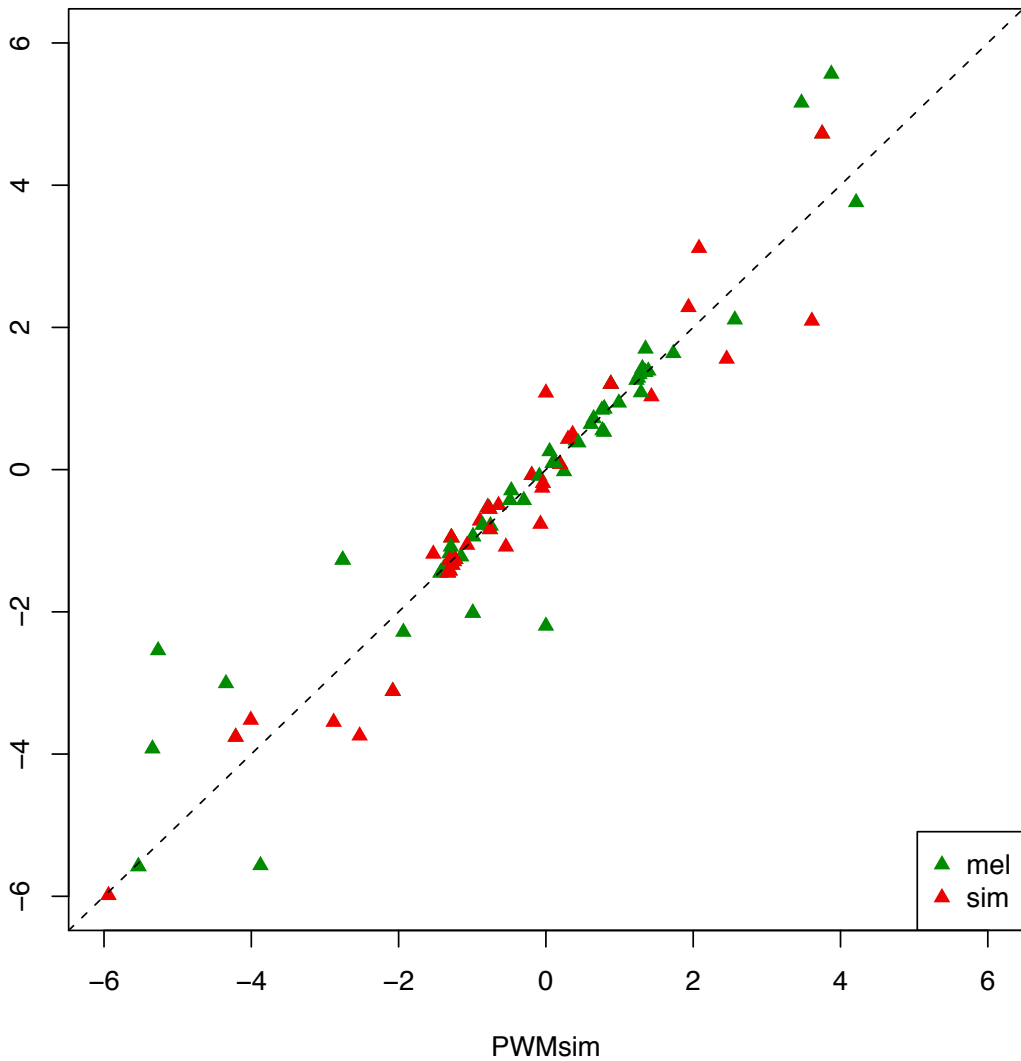

▲ mel  
▲ sim
