# Supplementary material for: Does Positive Selection Drive Transcription Factor Binding Site Turnover? A Test with Drosophila Cis-Regulatory Modules
Source: PLOS journal article supplement (doi:10.1371/journal.pgen.1002053), 2011-04-28
Supplement: S9 (10.1371/journal.pgen.1002053.s009) [file journal.pgen.1002053.s009.pdf › journal.pgen.1002053.s009.pdf]

**Table S1 CRM studied in this study**

| name   | symbol                       | Chromosome | start*   | end      | # footprints |
|--------|------------------------------|------------|----------|----------|--------------|
| CE1000 | E74 Promoter                 | chr3L      | 17612224 | 17612895 | 8            |
| CE1004 | h stripe 6                   | chr3L      | 8659948  | 8660496  | 25           |
| CE1006 | Fbp1 enhancer                | chr3L      | 14091229 | 14091302 | 2            |
| CE1007 | DNA IIA237 enhancer          | chr2R      | 5822784  | 5823022  | 2            |
| CE1008 | 475bp sev enhancer           | chrX       | 10973456 | 10973933 | 6            |
| CE1010 | dpp 812bp BE/VM enhancer     | chr2L      | 2445768  | 2446580  | 30           |
| CE1012 | h7 element                   | chr3L      | 8658176  | 8659109  | 41           |
| CE1013 | Stripe 3+7 enhancer          | chr2R      | 5863004  | 5863516  | 16           |
| CE1014 | 1.4kb posterior enhancer     | chr3R      | 4526528  | 4527944  | 9            |
| CE1016 | 2.7kb Dfd EAE                | chr3R      | 2611055  | 2613713  | 15           |
| CE1018 | NK-1 promoter                | chr3R      | 17382901 | 17383486 | 2            |
| CE1019 | dpp proximal promoter        | chr2L      | 2454605  | 2454756  | 4            |
| CE1020 | DNApol-alpha180_promoter     | chr3R      | 17497407 | 17497685 | 4            |
| CE1021 | eve promoter                 | chr2R      | 5866417  | 5866922  | 18           |
| CE1022 | tin B enhancer               | chr3R      | 17205669 | 17206042 | 3            |
| CE1025 | twist ventral activator      | chr2R      | 18933197 | 18933859 | 14           |
| CE1026 | ChAT 0.3kb 5' region         | chr3R      | 14530829 | 14531165 | 2            |
| CE1027 | eve MAS                      | chr2R      | 5861380  | 5861582  | 6            |
| CE1028 | ems enhancer element IV      | chr3R      | 9720483  | 9720788  | 4            |
| CE1029 | iab-2(1.7) enhancer          | chr3R      | 12636228 | 12637974 | 11           |
| CE1030 | sal enhancer                 | chr2L      | 11455638 | 11456155 | 18           |
| CE1031 | en promoter                  | chr2R      | 7415172  | 7415811  | 8            |
| CE1032 | tin 5' region                | chr3R      | 17203781 | 17205010 | 1            |
| CE1034 | Ubx BRE enhancer             | chr3R      | 12526644 | 12527144 | 17           |
| CE1035 | knirps 5' regulatory region  | chr3L      | 20689622 | 20690740 | 39           |
| CE1036 | eve mesodermal enhancer      | chr2R      | 5872553  | 5873441  | 17           |
| CE1037 | SRF-A intervein "c" enhancer | chr2R      | 20229766 | 20229892 | 1            |
| CE1038 | omb wing enhancer            | chrX       | 4280499  | 4281987  | 1            |
| CE1039 |                              | chr3L      | 14070015 | 14072441 | 16           |
| CE1041 | dpp promoter                 | chr2L      | 2452152  | 2452471  | 1            |
| CE1042 | Antp P1 promoter             | chr3R      | 2830803  | 2831280  | 3            |
| CE1047 | E2f promoter                 | chr3R      | 17458890 | 17459274 | 5            |
| CE1048 | tud promoter                 | chr2R      | 17070613 | 17071035 | 1            |
| CE1049 | Antp P2 promoter             | chr3R      | 2758361  | 2760662  | 64           |
| CE1050 | gsb_early_enhancer           | chr2R      | 20943848 | 20944882 | 19           |
| CE1051 | slbo P2                      | chr2R      | 20221605 | 20221785 | 1            |
| CE1054 | otp regulatory region        | chr2R      | 16786018 | 16787830 | 9            |
| CE1055 | slp1                         | chr2L      | 3823118  | 3824696  | 9            |
| CE1056 | eve stripe 2                 | chr2R      | 5865215  | 5865887  | 24           |
| CE1057 | alpha1 tubulin               | chr3R      | 2912163  | 2913017  | 14           |
| CE1058 | Ubx promoter                 | chr3R      | 12559789 | 12560360 | 20           |
| CE1061 | Race 533bp enhancer          | chr2L      | 13904731 | 13905265 | 3            |
| CE1062 | dorsal vessel enhancer       | chr2R      | 20191677 | 20191999 | 2            |
| CE1064 | Trl promoter                 | chr3L      | 14750248 | 14751686 | 27           |
| CE1067 | so10 enhancer                | chr2R      | 3318590  | 3319018  | 8            |
| CE1068 | Ubx PRE                      | chr3R      | 12589355 | 12590918 | 50           |

|        |                          |       |          |          |    |
|--------|--------------------------|-------|----------|----------|----|
| CE1069 | tin D                    | chr3R | 17209338 | 17209690 | 12 |
| CE1073 | B3-15 vm1 enhancer       | chr2R | 20196541 | 20196901 | 6  |
| CE1074 | tll CD1                  | chr3R | 26676774 | 26677274 | 8  |
| CE1075 | ftz-f1 promoter          | chr3L | 18758302 | 18758908 | 3  |
| CE1076 | zen promoter             | chr3R | 2579902  | 2581525  | 25 |
| CE1077 | rho NEE                  | chr3L | 1461790  | 1462115  | 10 |
| CE1078 | snail promoter           | chr2L | 15478269 | 15480270 | 12 |
| CE1079 | Dll NRE                  | chr2R | 20690304 | 20691195 | 3  |
| CE1080 | vg boundary              | chr2R | 8776378  | 8777133  | 5  |
| CE1081 | vg quadrant enhancer     | chr2R | 8783677  | 8784481  | 8  |
| CE1082 | vvl autoreg enhancer     | chr3L | 6778064  | 6778580  | 2  |
| CE1084 | ph-p1                    | chrX  | 2034243  | 2034683  | 6  |
| CE1085 | ph-d1                    | chrX  | 2019326  | 2019622  | 5  |
| CE1086 | ph-d2                    | chrX  | 2018150  | 2018483  | 2  |
| CE1088 | scs fragment C           | chr3R | 7775364  | 7775488  | 1  |
| CE1089 | hairy stripe 3+4         | chr3L | 8657462  | 8658374  | 15 |
| CE1090 | Dpt promoter             | chr2R | 14752946 | 14753349 | 4  |
| CE1094 | Deb-A                    | chr2R | 8085631  | 8086424  | 2  |
| CE1098 | Jra promoter             | chr2R | 5984349  | 5984683  | 1  |
| CE1099 | Sgs4                     | chrX  | 3143318  | 3144141  | 30 |
| CE1101 | Act 5C proximal promoter | chrX  | 5795566  | 5796038  | 1  |
| CE1102 | sim_2.8_Pe               | chr3R | 8895635  | 8898460  | 9  |
| CE1103 | Sgs3_promoter            | chr3L | 11505175 | 11505337 | 3  |
| CE1104 | Sgs3_63bp_5'region       | chr3L | 11504674 | 11504738 | 2  |
| CE1105 | E74_KpnI_RcoRI_intron    | chr3L | 17580603 | 17580926 | 3  |
| CE1106 | Eip74Eg_promoter         | chr3L | 15650460 | 15650886 | 9  |
| CE1107 | sc_L3/TSM_enhancer       | chrX  | 289651   | 289904   | 2  |
| CE1108 | sc_SMC_enhancer          | chrX  | 286995   | 287352   | 1  |
| CE1109 | ko_intronic_enhancer     | chr3L | 21080606 | 21081587 | 3  |
| CE1110 | ras_promoter_cBE76       | chrX  | 10638961 | 10639282 | 3  |
| CE1112 | hsp23 promoter           | chr3L | 9373335  | 9373683  | 9  |
| CE1115 | P1 promoter fragment I   | chr3R | 2827205  | 2827388  | 4  |
| CE1116 | P1 promoter fragment II  | chr3R | 2825808  | 2826148  | 4  |
| CE1118 | P1 promoter fragment IV  | chr3R | 2823441  | 2823507  | 3  |
| CE1121 | ftz zebra element        | chr3R | 2689374  | 2690045  | 19 |
| CE1122 | ind cis-regulatory       | chr3L | 15033494 | 15033709 | 3  |
| CE1123 | Lz_LMEE                  | chrX  | 9181194  | 9181476  | 1  |
| CE1126 | copia LTR                | chrX  | 4178496  | 4183743  | 1  |
| CE1127 | ftz_USE                  | chr3R | 2683637  | 2686199  | 58 |
| CE1128 | Cp15 promoter            | chr3L | 8721445  | 8721581  | 3  |
| CE1129 | Cf2 promoter             | chr2L | 4883103  | 4883234  | 1  |
| CE1131 | sal 1.1 enhancer         | chr2L | 11454343 | 11455436 | 8  |
| CE1132 | kni L2 enhancer          | chr3L | 20699779 | 20700471 | 5  |
| CE1133 | ct enhancer              | chrX  | 7424257  | 7424926  | 7  |
| CE1134 | PCNA promoter            | chr2R | 16150202 | 16150749 | 6  |
| CE1135 | bab1_intron1             | chr3L | 1085706  | 1086298  | 4  |
| CE1136 | bab2_intron1             | chr3L | 1175395  | 1175613  | 2  |
| CE1138 | Adh_promoter             | chr2L | 14614893 | 14616302 | 26 |
| CE1140 | scs'                     | chr3R | 7788458  | 7789554  | 5  |

|        |                     |           |          |          |    |
|--------|---------------------|-----------|----------|----------|----|
| CE1141 | otu_promoter        | chrX      | 8383414  | 8383958  | 3  |
| CE1144 | Sxl_intron          | chrX      | 6985658  | 6986870  | 2  |
| CE1145 | Orb_promoter        | chr3R     | 19105085 | 19106451 | 1  |
| CE1146 | ovo_promoter        | chrX      | 4957413  | 4958494  | 6  |
| CE1147 | glass_promoter      | chr3R     | 14200149 | 14200999 | 2  |
| CE1148 | ninaE_promoter      | chr3R     | 15713875 | 15714387 | 5  |
| CE1149 | en_promoter         | chr2R     | 7415997  | 7416555  | 14 |
| CE1150 | en_intron           | chr2R     | 7412745  | 7414506  | 15 |
| CE1151 | U1_promoter         | chr3R     | 19685239 | 19685733 | 1  |
| CE1152 | ftz_3'_region       | chr3R     | 2691949  | 2692335  | 1  |
| CE1155 | Actin5C_promoter    | chrX      | 5794681  | 5795112  | 4  |
| CE1156 | Hsp27 promoter      | chr3L     | 9376508  | 9376729  | 1  |
| CE1157 | ACE                 | chr3L     | 8719259  | 8719581  | 8  |
| CE1159 | tll_promoter        | chr3R     | 26677662 | 26678030 | 8  |
| CE1160 | dpp_disk_BS1.1      | chr2L     | 2469788  | 2471532  | 5  |
| CE1161 | dpp_VRR_intron      | chr2L     | 2455937  | 2457661  | 23 |
| CE1162 | hb_promoter         | chr3R     | 4520300  | 4524677  | 20 |
| CE1164 | Ddc_intron_promoter | chr2L     | 19119460 | 19123023 | 32 |
| CE1169 |                     | 117 chr3R | 7799721  | 7799941  | 2  |
| CE1170 |                     | 410 chr3L | 11552404 | 11552514 | 1  |
| CE1172 | 11B11               | chrX      | 2071273  | 2071411  | 2  |
| CE1173 | 11G4                | chr3R     | 13210846 | 13211094 | 2  |
| CE1174 | 11G5                | chr2R     | 17085621 | 17085745 | 2  |
| CE1175 | 11F6                | chrX      | 12524387 | 12524538 | 1  |
| CE1176 |                     | 116 chr3R | 13520975 | 13521188 | 2  |
| CE1177 |                     | 417 chr3R | 21067232 | 21067420 | 3  |
| CE1178 |                     | 110 chr3L | 5571882  | 5572102  | 2  |
| CE1179 |                     | 407 chr2R | 6202914  | 6203028  | 3  |
| CE1181 | pbx_extended        | chr3R     | 12598627 | 12600114 | 25 |
| CE1182 | DNA pol alpha 73    | chr3R     | 23064563 | 23065162 | 3  |
| CE1183 | tsh enhancer        | chr2L     | 21852963 | 21853592 | 16 |
| CE1184 | lab550 enhancer     | chr3R     | 2507112  | 2507664  | 3  |
| CE1185 | Antp_P1_promoter    | chr3R     | 2824411  | 2825376  | 9  |
| CE1186 | twi promoter        | chr2R     | 18932628 | 18933070 | 3  |
| CE1187 | white promoter      | chrX      | 2690577  | 2691909  | 9  |
| CE1188 | white intron        | chrX      | 2689167  | 2689286  | 2  |
| CE1189 | Ubx promoter        | chr3R     | 12562550 | 12563348 | 4  |
| CE1190 | Ubx 3'              | chr3R     | 12481453 | 12481572 | 3  |
| CE1191 | dpp promoter        | chr2L     | 2450830  | 2450949  | 3  |
| CE1192 | zeste promoter      | chrX      | 2341986  | 2342105  | 2  |
| CE1193 | Hsp70 promoter      | chr3R     | 7783054  | 7784301  | 13 |
| CE1194 | hsp26 promoter      | chr3L     | 9370273  | 9370988  | 5  |
| CE1195 | hsp83 promoter      | chr3L     | 3193048  | 3193256  | 1  |
| CE1196 | E(spl) promoter     | chr3R     | 21865315 | 21866073 | 2  |
| CE1197 | ac promoter         | chrX      | 263167   | 264014   | 2  |
| CE1198 | l(1)sc promoter     | chrX      | 302783   | 303755   | 2  |
| CE1199 | yp1 promoter        | chrX      | 9947564  | 9947891  | 11 |
| CE1200 | Ser wing enhancer   | chr3R     | 22997005 | 22997817 | 25 |
| CE1201 | ems enhancer        | chr3R     | 9723513  | 9724763  | 10 |

|        |                         |       |         |         |   |
|--------|-------------------------|-------|---------|---------|---|
| CE1204 | ftz_neurogenic_enhancer | chr3R | 2687125 | 2689005 | 4 |
| CE1205 | Sxl_promoter            | chrX  | 6986907 | 6988310 | 1 |

\* the coordinates are based on dm3
