# Supplementary material for: Does Positive Selection Drive Transcription Factor Binding Site Turnover? A Test with Drosophila Cis-Regulatory Modules
Source: PLOS journal article supplement (doi:10.1371/journal.pgen.1002053), 2011-04-28
Supplement: S10 (10.1371/journal.pgen.1002053.s010) [file journal.pgen.1002053.s010.pdf › journal.pgen.1002053.s010.pdf]

**Table S2. Percentage of gain and loss of TFBS predicted by two set of cutoffs**

| Functional category | Cutoff 80% <sup>b</sup> |      | Cutoff 0 |      |
|---------------------|-------------------------|------|----------|------|
|                     | number                  | %    | number   | %    |
| Conserved           | 487                     | 75.6 | 547      | 84.8 |
| Weak <sup>a</sup>   | 124                     | 19.3 | 70       | 10.9 |
| Loss                |                         |      |          |      |
| <i>mel</i>          | 2                       | 0.3  | 0        | 0    |
| <i>sim</i>          | 16                      | 2.5  | 16       | 2.5  |
| Gain                |                         |      |          |      |
| <i>mel</i>          | 14                      | 2.2  | 12       | 1.9  |
| <i>sim</i>          | 1                       | 0.2  | 0        | 0    |

<sup>a</sup>weak binding sites: due to the arbitrary cutoff applied, for some footprint sites neither *mel* nor *sim* sequence passed the cutoff and are categorized under "weak sites". <sup>b</sup> The 80% cutoff is chosen by ranking all TFBS for a particular TF from high to low by their PWM scores and then taking the 80% quantile.
