# Supplementary material for: Does Positive Selection Drive Transcription Factor Binding Site Turnover? A Test with Drosophila Cis-Regulatory Modules
Source: PLOS journal article supplement (doi:10.1371/journal.pgen.1002053), 2011-04-28
Supplement: S11 (10.1371/journal.pgen.1002053.s011) [file journal.pgen.1002053.s011.pdf › journal.pgen.1002053.s011.pdf]

**Table S3. The pattern of excess for aff-dec mutations in *sim* is robust to choices of cutoff**

| <b>SIM</b>                  | <b>fix</b> | <b>poly#</b> | <b>ratio</b> | <b>FET p</b> |
|-----------------------------|------------|--------------|--------------|--------------|
| <b><i>Coding</i></b>        |            |              |              |              |
| Non                         | 312        | 438          | 0.71         | 9E-09        |
| Syn                         |            |              |              |              |
| <i>No Chg</i>               | 162        | 446          | 0.36         |              |
| <i>P-&gt;U</i>              | 449        | 1714         | 0.26         | 0.002        |
| <i>U-&gt;P</i>              | 319        | 695          | 0.46         | 0.04         |
| <b><i>CRM (aff-dec)</i></b> |            |              |              |              |
| all                         | 38         | 35           | 1.09         | 2E-05        |
| anc.score>0                 | 31         | 35           | 0.89         | 1E-04        |
| anc.score>2                 | 28         | 33           | 0.85         | 3E-03        |
| (all dec)*                  | 33         | 38           | 0.87         | 4E-04        |

\* in the first three rows in aff-dec class, aff-dec mutations are called when PWM score change<-1, the 4th row is the same as the third with respect to the inclusion of footprint sites except it uses all mutations that has PWM score change<0
