# Supplementary material for: Does Positive Selection Drive Transcription Factor Binding Site Turnover? A Test with Drosophila Cis-Regulatory Modules
Source: PLOS journal article supplement (doi:10.1371/journal.pgen.1002053), 2011-04-28
Supplement: S12 (10.1371/journal.pgen.1002053.s012) [file journal.pgen.1002053.s012.pdf › journal.pgen.1002053.s012.pdf]

**Table S4. TF protein sequence divergence in different functional regions between *mel* and *sim***

| Factor    | type                                           | L    | Div total | DNA Binding | Other domains |
|-----------|------------------------------------------------|------|-----------|-------------|---------------|
| abd-A     | Antp Homeobox Family                           | 590  | 0         | 0           | 0             |
| Antp      | Antp Homeobox Family                           | 378  | 0         | 0           | 0             |
| Ap        | Homeobox                                       | 469  | 0         | 0           | 0             |
| Bcd       | Homeobox                                       | 494  | 7         | 0           | 0             |
| Cad       | Homeobox                                       | 427  | 6         | 0           | 0             |
| Deaf1     | SAND+MYND finger                               | 576  | 2         | 0           | 0             |
| DI        | RHD                                            | 999  | 21        | *1          | 0             |
| En        | engrailed homeobox family                      | 552  | 1         | 0           | 0             |
| Eve       | even-skipped homeobox family                   | 376  | 3         | 0           | 0             |
| Hb        | hunchback C2H2-type zinc-finger protein family | 758  | 5         | 0           | 0             |
| Kni       | nuclear hormone receptor                       | 429  | 6         | 0           | 0             |
| Kr        | Kruple C2H2-type zinc-finger protein family    | 502  | 6         | 0           | 0             |
| Mad       | Caudal Homeodomain Family                      | 427  | 0         | 0           | 0             |
| Ovo       | C2H2 zinc finger                               | 1351 | 30        | 0           | 0             |
| Pan       | HMG box                                        | 751  | 18        | 0           | 0             |
| Prd       | Homeobox                                       | 613  | 4         | 0           | 0             |
| Slbo      | bzip                                           | 449  | 7         | 0           | 0             |
| Tin       | Homeobox                                       | 416  | 7         | 0           | 0             |
| Tll       | Nuclear Receptor                               | 452  | 1         | 0           | 0             |
| Trl       | BTB domain                                     | 581  | 0         | 0           | 0             |
| Twi       | bHLH                                           | 490  | 7         | 0           | 0             |
| Vvl       | Homeobox                                       | 427  | 4         | 0           | 0             |
| z (zeste) | (unannotated)                                  | 575  | 8         | 0           | 0             |
| Zen       | Homeobox                                       | 353  | 19        | 0           | 0             |

\* Asp(D)->Glu(E) in the RHD domain (DNA binding) between *mel* and *sim*
