# Supplementary material for: Does Positive Selection Drive Transcription Factor Binding Site Turnover? A Test with Drosophila Cis-Regulatory Modules
Source: PLOS journal article supplement (doi:10.1371/journal.pgen.1002053), 2011-04-28
Supplement: S13 (10.1371/journal.pgen.1002053.s013) [file journal.pgen.1002053.s013.pdf › journal.pgen.1002053.s013.pdf]

**Table S5. PWM derived from SELEX sequences using MEME**

| Factor | Min | Max | L  | best<br>round | SELEX Matrix |             | Footprint Matrix |             |
|--------|-----|-----|----|---------------|--------------|-------------|------------------|-------------|
|        |     |     |    |               | Sensitivity  | Specificity | Sensitivity      | Specificity |
| Kr     | 10  | 10  | 10 | 4(2)          | 0.75         | 3.97        | 0.77             | 7.85        |
| bcd    | 8   | 8   | 8  | 3(2)          | 0.89         | 3.97        | 0.89             | 10.02       |
| cad    | 8   | 8   | 8  | 2             | 0.69         | 4           | 0.46             | 20.83       |
| hb     | 9   | 12  | 11 | 3             | 0.87         | 3.72        | 0.98             | 11.55       |
| prd    | 8   | 12  | 11 | 3             | 0.81         | 3.09        | 1                | 10.36       |
| twi    | 8   | 12  | 12 | 3             | 1            | 39.13       | 0.8              | 25.25       |

<sup>a</sup>cutoff for calling a binding sites is chosen to be 0 for the PWM score

<sup>b</sup>number of total predicted hits per footprint site hit (a PWM match within footprint region)
